# Supplementary material for: NuRD‐independent Mi‐2 activity represses ectopic gene expression during neuronal maturation
Source: PubMed Central journal article supplement (PMC10074086; doi:10.15252/embr.202255362), 2023-02-01
Supplement: EMBR-24-e55362-s001.pdf [file EMBR-24-e55362-s001.pdf]

1 **NuRD independent Mi-2 activity represses ectopic gene expression during neuronal**  
2 **maturation.**

3 Gabriel N Aughey<sup>‡</sup>, Elhana Forsberg<sup>†</sup>, Krista Grimes<sup>†</sup>, Shen Zhang<sup>†</sup>, Tony D Southall<sup>\*</sup>

4 <sup>†</sup>Equal contribution

5 <sup>\*</sup>Correspondence to t.southall@imperial.ac.uk

6 Department of Life Sciences, Imperial College London, Sir Ernst Chain Building, London, UK

7 <sup>‡</sup>Current address: Department of Clinical and Experimental Epilepsy, UCL Queen Square Institute of Neurology,  
8 London, United Kingdom.

9 **Appendix information**

10 **Contents:**

11 **Appendix Figure S1.** Tissue enrichment analysis for differentially upregulated genes  
12 associated with the “cilium organisation” GO term.

13 **Appendix Figure S2.** Expression of differentially expressed genes in other tissues.

14 **Appendix Figure S3.** Verification of *Mi-2* and *HDAC1* RNAi lines.

15 **Appendix Figure S4.** Pupal lethality in NuRD component RNAi knockdown experiments

16  
17 **Appendix Table S1.** Fly stocks used.

18 **Appendix Table S2.** DNA oligos used in this study.

19 **Appendix References**

20

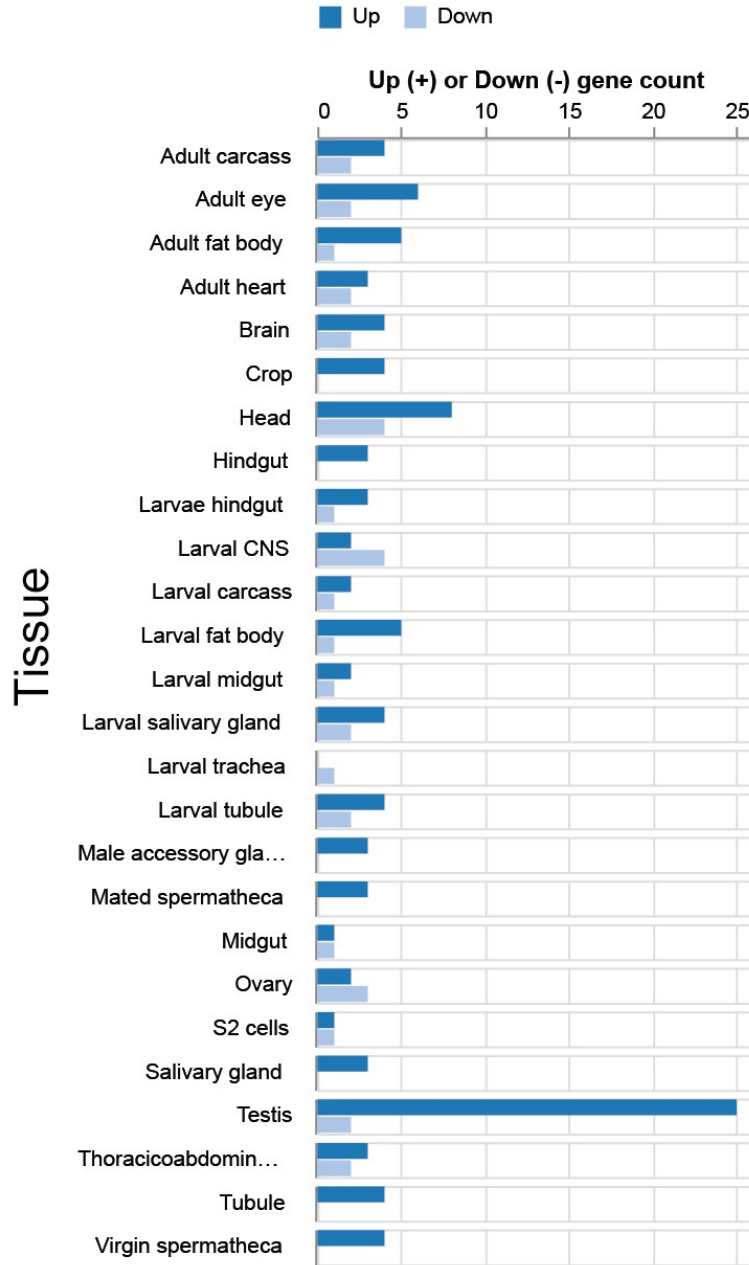

22

23

24

25 **Appendix figure S1. Tissue enrichment analysis for differentially upregulated genes associated**  
 26 **with the “cilium organisation” GO term.** The majority of these genes are highly upregulated in testis.  
 27 “Up” and “Down” refer to genes in the set that are significantly up or downregulated in the respective  
 28 tissue.

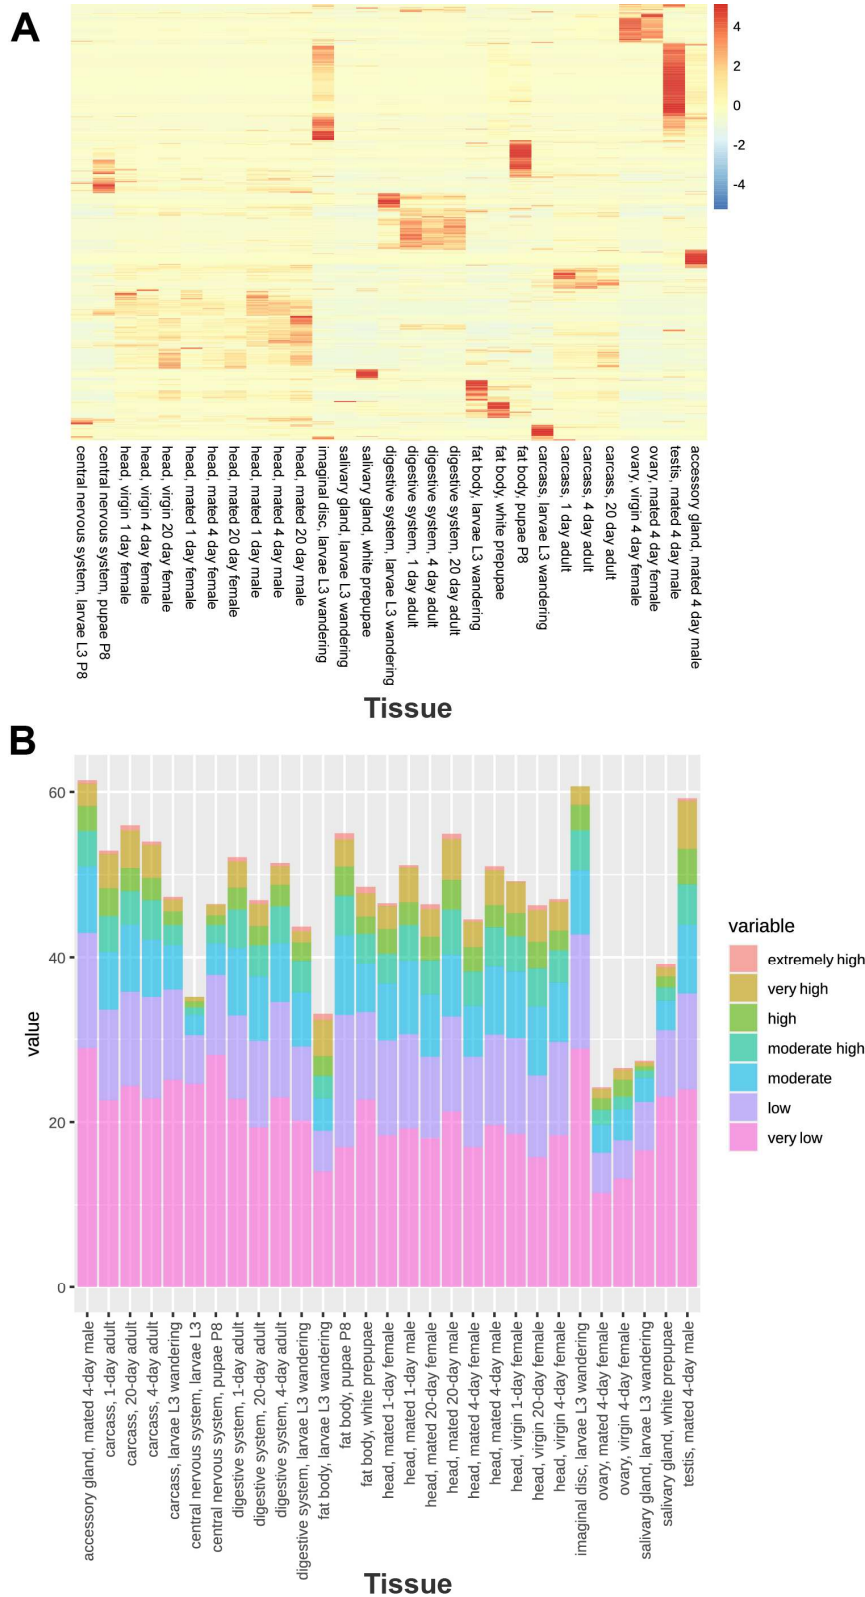

30

31 **Appendix figure S2. Expression of differentially expressed genes in other tissues.** A) Heatmap  
 32 showing relative expression levels of upregulated genes across all tissues. B) Stacked bar plot showing  
 33 percentage of upregulated genes that are expressed at different levels in specific tissues. Note that many  
 34 upregulated genes are expressed at “very low” levels in the fly CNS, whilst upregulated genes are  
 35 frequently expressed at “moderate” to very high levels in germline and other non-CNS tissues.

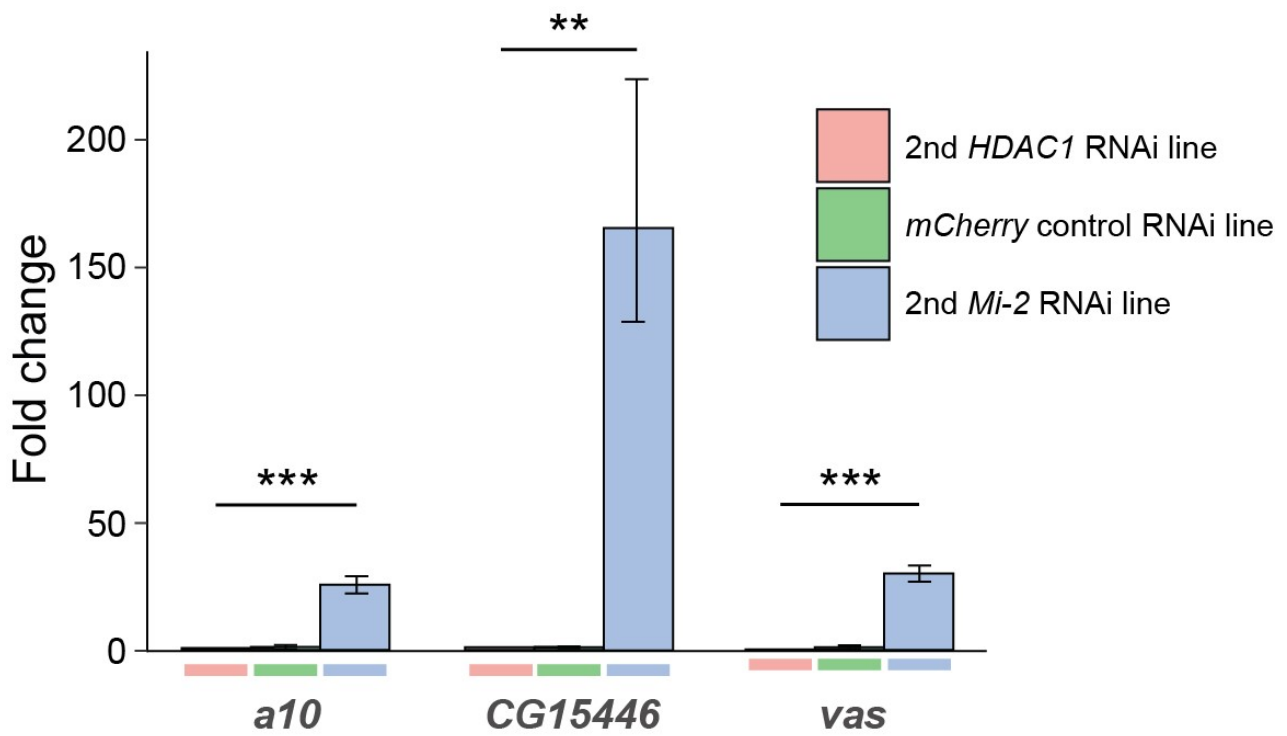

36

37 **Appendix figure S3. Verification of *Mi-2* and *HDAC1* RNAi lines.** qPCR measurement of non-neuronal  
 38 genes in larval brains using alternative RNAi lines for *Mi-2* and *HDAC* (n = 3). These confirm the results  
 39 obtained using the original RNAi lines. \*\*P < 0.005, \*\*\*P < 0.0005 (one-tailed student's t-test). Error bars  
 40 show standard deviation. Represented as mean ± SEM.

41

42

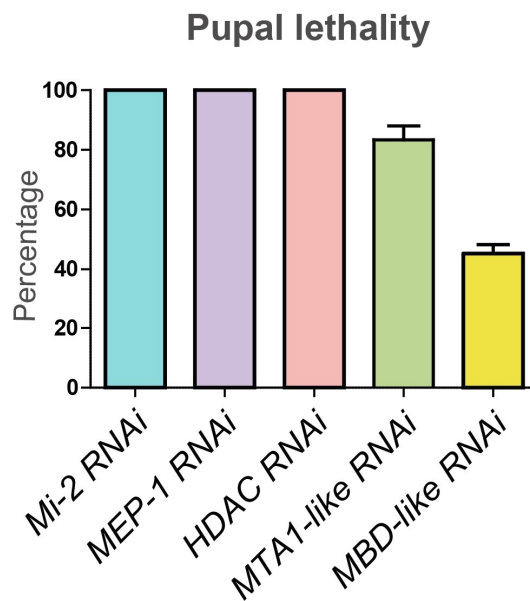

43

44 **Appendix figure S4. Pupal lethality in NuRD component RNAi knockdown experiments.**  
 45 Percentage of pupae that die when NuRD subunits are knocked down in neurons (driven by *elav-*  
 46 *GAL4*) during development. 3 independent experiments were performed for each genotype.

47 **Appendix Table S1. Fly stocks used.**

| <b>Genotype</b>                                                                                                                                                                      | <b>Source</b>  | <b>Reference</b>                | <b>Description</b> |
|--------------------------------------------------------------------------------------------------------------------------------------------------------------------------------------|----------------|---------------------------------|--------------------|
| <i>y<sup>1</sup>w<sup>*</sup></i> ; <i>Mi{PT-GFSTF.1}Mi-2<sup>MI07934-GFSTF.1</sup></i><br><i>Su(Tpl)<sup>MI07934-GFSTF.1-X/TM6C</sup></i> ,<br><i>Sb<sup>1</sup> Tb<sup>1</sup></i> | BDSC #63188    | (Nagarkar-Jaiswal et al., 2015) | Mi-2 GFP trap      |
| <i>y<sup>1</sup> w<sup>*</sup></i> ; <i>Mi{PT-GFSTF.1}MTA1-like<sup>MI01790-GFSTF.1</sup></i>                                                                                        | BDSC #63161    | (Nagarkar-Jaiswal et al., 2015) | MTA GFP trap       |
| <i>UAS-LT3-Dam</i>                                                                                                                                                                   | Andrea Brand   | (Southall et al., 2013)         |                    |
| <i>UAS- Dam-MEP-1</i>                                                                                                                                                                | This study     |                                 |                    |
| <i>UAS-Dam-Mi-2</i>                                                                                                                                                                  | This study     |                                 |                    |
| <i>UAS-MTA1-like-Dam</i>                                                                                                                                                             | This study     |                                 | flyORF TaDa        |
| <i>UAS-HDAC-Dam</i>                                                                                                                                                                  | This study     |                                 | flyORF TaDa        |
| <i>wor-GAL4; tub-GAL80<sup>ts</sup></i>                                                                                                                                              | Andrea Brand   | (Albertson et al., 2004)        |                    |
| <i>wor-GAL4</i>                                                                                                                                                                      | Andrea Brand   | (Albertson et al., 2004)        |                    |
| <i>elav-GAL4; tub-GAL80<sup>ts</sup></i>                                                                                                                                             | Andrea Brand   |                                 |                    |
| <i>nSyb-GAL4</i>                                                                                                                                                                     | BDSC #51941    |                                 |                    |
| <i>hs-flp; UAS-flyORF.TaDa</i>                                                                                                                                                       | BDSC #91637    | (Aughey et al., 2021)           |                    |
| <i>UAS-HDAC1</i>                                                                                                                                                                     | FlyORF F000675 | (Bischof et al., 2013)          |                    |
| <i>UAS-MTA1-like</i>                                                                                                                                                                 | FlyORF F001892 | (Bischof et al., 2013)          |                    |
| <i>UAS-Mi2 RNAi</i>                                                                                                                                                                  | BDSC #51774    |                                 |                    |
| <i>UAS-Mi2 RNAi (2<sup>nd</sup> line)</i>                                                                                                                                            | BDSC #35398    |                                 |                    |
| <i>UAS-MTA1-like RNAi</i>                                                                                                                                                            | BDSC #34624    |                                 |                    |
| <i>UAS-HDAC1 RNAi</i>                                                                                                                                                                | BDSC #33725    |                                 |                    |
| <i>UAS-HDAC1 RNAi (2<sup>nd</sup> line)</i>                                                                                                                                          | BDSC #34846    |                                 |                    |
| <i>UAS-MEP-1 RNAi</i>                                                                                                                                                                | BDSC #62180    | (Perkins et al., 2015)          |                    |
| <i>UAS-MBD-like RNAi</i>                                                                                                                                                             | VDRC #9261     | (Dietzl et al., 2007)           |                    |
| <i>mCherry-RNAi (control)</i>                                                                                                                                                        | BDSC #35787    |                                 |                    |
| <i>repo-GAL80</i>                                                                                                                                                                    | Manolis Fanto  | (Awasaki et al., 2008)          |                    |
| <i>elav-GAL4 ; repo-GAL80 / TM6</i>                                                                                                                                                  | This study     |                                 |                    |

48

49

50

51

52 **Appendix Table S2. DNA oligos used in this study.**

| <b>Primer name</b>             | <b>Primer sequence</b>                                      |
|--------------------------------|-------------------------------------------------------------|
| <i>vas</i> qRT-PCR forward     | TGTCTGACGACTGGGATGATG                                       |
| <i>vas</i> qRT-PCR reverse     | ATTTCTCCTTGGTAGCCGC                                         |
| <i>CG17566</i> qRT-PCR forward | TTGGGCCAATGTGGCAATCA                                        |
| <i>CG17566</i> qRT-PCR reverse | TGCGATCCTGTCCATCGGT                                         |
| <i>qin</i> qRT-PCR forward     | TCCCTTTCTACTGGGATGCG                                        |
| <i>qin</i> qRT-PCR reverse     | GAGCTGGACTATGGCACACG                                        |
| <i>RpS5b</i> qRT-PCR forward   | ACTACATTGCCGTAAAGGAGAAG                                     |
| <i>RpS5b</i> qRT-PCR reverse   | CATTGGGCCTTGCGBAATC                                         |
| <i>CG8526</i> qRT-PCR forward  | GATTTGATTGAGTTCTGCCCACT                                     |
| <i>CG8526</i> qRT-PCR reverse  | CTTGTATGTCTTTCCCACTTCGT                                     |
| <i>CG15446</i> qRT-PCR forward | CGGAAACGGCTACCCATGT                                         |
| <i>CG15446</i> qRT-PCR reverse | CCCCGACTTACCTTCATCTTCG                                      |
| <i>a10</i> qRT-PCR forward     | ATCCTTAACCAAGAGCGACTGT                                      |
| <i>a10</i> qRT-PCR reverse     | TCACCTTTTCAGCACCATAACC                                      |
| <i>RpL4</i> qRT-PCR forward    | TCCACCTTGAAGAAGGGCTA                                        |
| <i>RpL4</i> qRT-PCR reverse    | TTGCGGATCTCCTCAGACTT                                        |
| <i>Dam-Mi2_forward</i>         | gaagaggatctggccggcgagatctgaggATGGCATCGGAGGAAGAGAATGACGATAAT |
| <i>Dam-Mi2_reverse</i>         | aagtaaggtccttcacaaagatcctctagCTAGACGCCGAATTATTCGATAGCTGGCC  |
| <i>Dam-MEP-1_forward</i>       | gaagaggatctggccggcgagatctgaggATGACTGAAGTTGATGTCGTTTTGCCGGAG |
| <i>Dam-MEP-1_reverse</i>       | aagtaaggtccttcacaaagatcctctagTTAATCTATGACATGACTCTCCATATTTG  |

53

54

## 55 **Appendix References**

- 56 Albertson, R., Chabu, C., Sheehan, A., and Doe, C.Q. (2004). Scribble protein domain mapping reveals a  
57 multistep localization mechanism and domains necessary for establishing cortical polarity. *J Cell Sci* 117,  
58 6061-6070.
- 59 Aughey, G.N., Delandre, C., McMullen, J.P.D., Southall, T.D., and Marshall, O.J. (2021). FlyORF-TaDa allows  
60 rapid generation of new lines for in vivo cell-type-specific profiling of protein-DNA interactions in *Drosophila*  
61 *melanogaster*. *G3 (Bethesda)* 11.
- 62 Awasaki, T., Lai, S.L., Ito, K., and Lee, T. (2008). Organization and postembryonic development of glial cells in  
63 the adult central brain of *Drosophila*. *J Neurosci* 28, 13742-13753.
- 64 Bischof, J., Bjorklund, M., Furger, E., Schertel, C., Taipale, J., and Basler, K. (2013). A versatile platform for  
65 creating a comprehensive UAS-ORFeome library in *Drosophila*. *Development* 140, 2434-2442.
- 66 Dietzl, G., Chen, D., Schnorrer, F., Su, K.C., Barinova, Y., Fellner, M., Gasser, B., Kinsey, K., Oppel, S.,  
67 Scheiblaue, S., *et al.* (2007). A genome-wide transgenic RNAi library for conditional gene inactivation in  
68 *Drosophila*. *Nature* 448, 151-156.
- 69 Nagarkar-Jaiswal, S., Lee, P.T., Campbell, M.E., Chen, K., Anguiano-Zarate, S., Gutierrez, M.C., Busby, T., Lin,  
70 W.W., He, Y., Schulze, K.L., *et al.* (2015). A library of MiMICs allows tagging of genes and reversible, spatial  
71 and temporal knockdown of proteins in *Drosophila*. *Elife* 4.
- 72 Perkins, L.A., Holderbaum, L., Tao, R., Hu, Y., Sopko, R., McCall, K., Yang-Zhou, D., Flockhart, I., Binari, R., Shim,  
73 H.S., *et al.* (2015). The Transgenic RNAi Project at Harvard Medical School: Resources and Validation. *Genetics*  
74 201, 843-852.
- 75 Southall, T.D., Gold, K.S., Egger, B., Davidson, C.M., Caygill, E.E., Marshall, O.J., and Brand, A.H. (2013). Cell-  
76 type-specific profiling of gene expression and chromatin binding without cell isolation: assaying RNA Pol II  
77 occupancy in neural stem cells. *Dev Cell* 26, 101-112.

78
