# Supplementary material for: NuRD‐independent Mi‐2 activity represses ectopic gene expression during neuronal maturation
Source: PubMed Central journal article supplement (PMC10074086; doi:10.15252/embr.202255362), 2023-02-01
Supplement: EMBR-24-e55362-s004.pdf [file EMBR-24-e55362-s004.pdf]

## Expanded View Figures

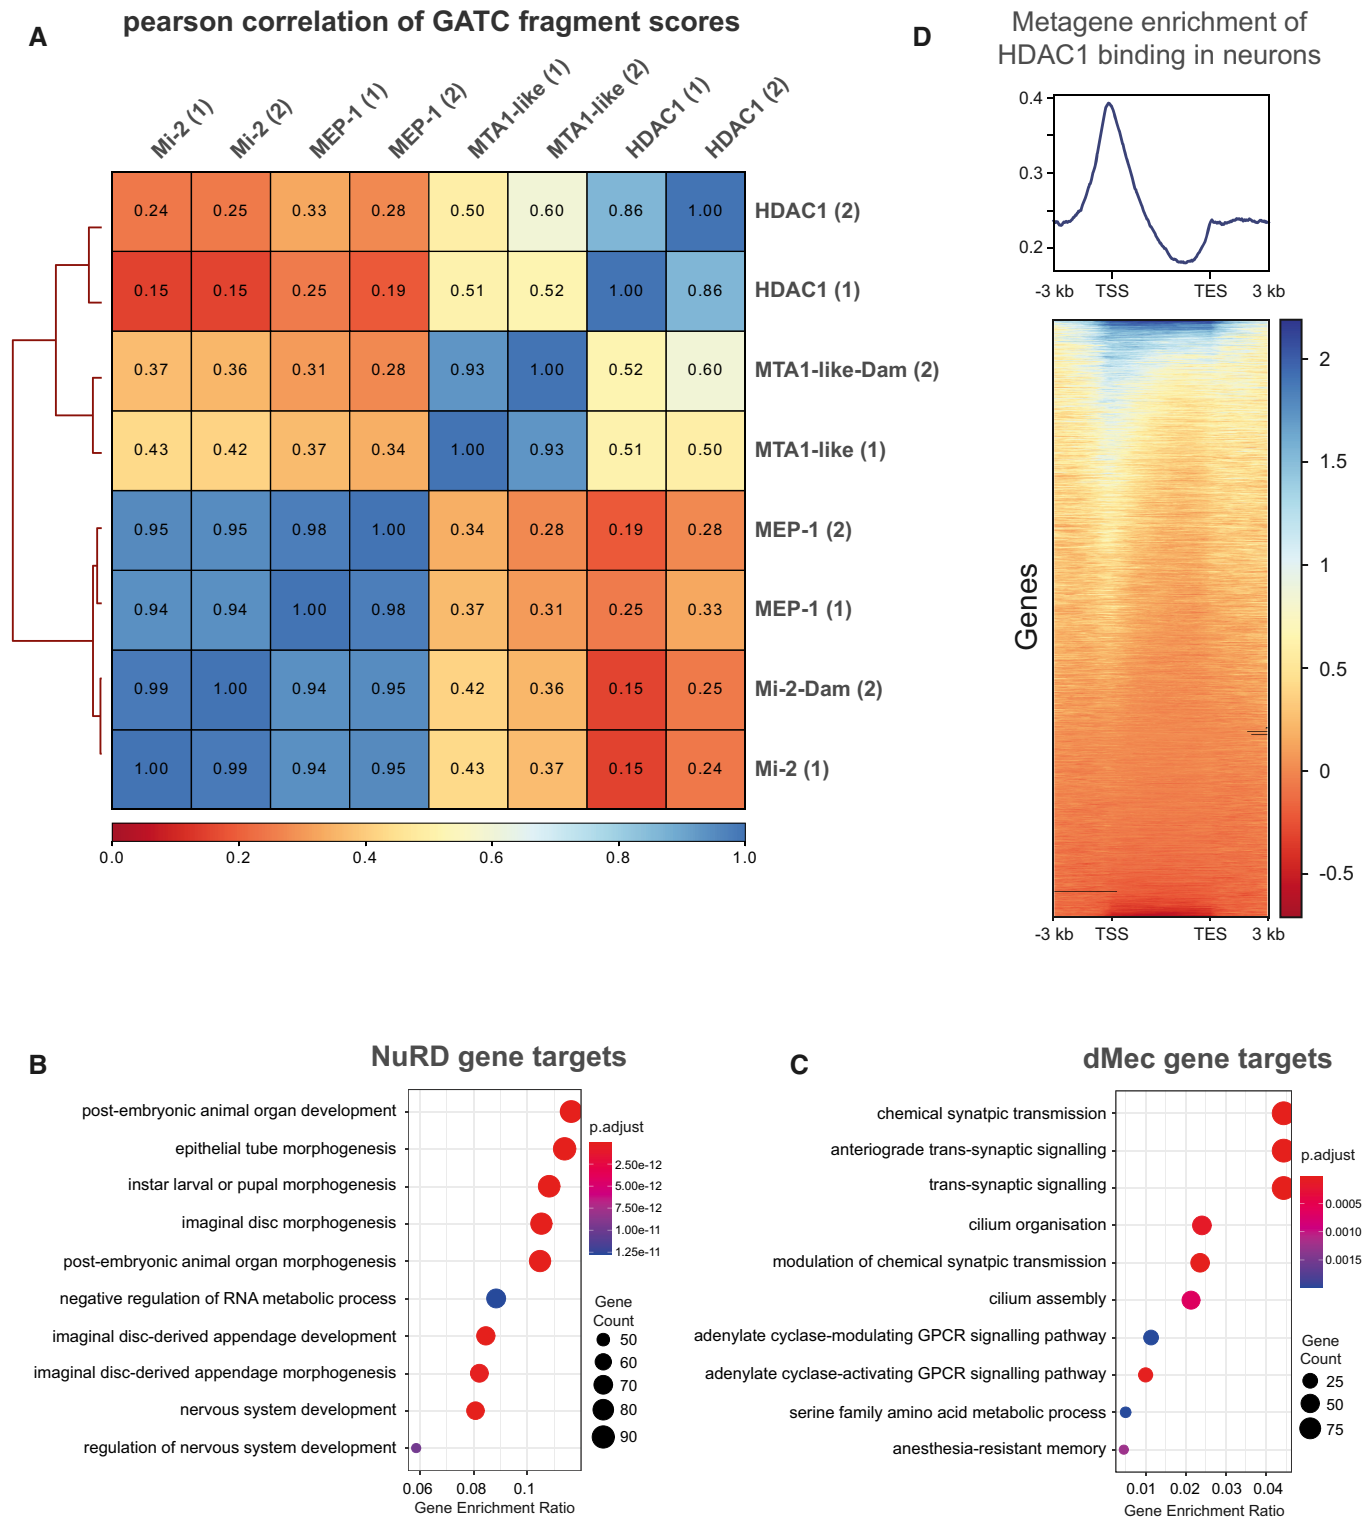

Figure EV1.

**Figure EV1. Genomic binding of NuRD components.**

- A Correlation between NuRD subunits (including replicates) in larval neurons (*elav-GAL4*). Very strong correlations are seen between Mi-2 and MEP-1 binding while the correlation between Mi-2/MEP-1 and either MTA-1like or HDAC1 is relatively lower. Good correlations are exhibited between replicates for each subunit (spearman's correlation  $r^2 = 0.85\text{--}0.95$ ).
- B GO analysis of NuRD gene targets.
- C GO analysis of dMec gene targets genes.
- D Metagene analysis of HDAC1 binding. TSS is Transcriptional Start Site, and TES is Transcriptional End Site.

**Figure EV2. RNA-seq quality control and differentially expressed genes.**

- A Heatmap showing Pearson correlation of RNA-seq reads between biological replicates and control and experimental groups. Very strong correlations are observed between replicates ( $R^2 > 0.97$ ) with slightly lower correlations between knockdown and controls reflecting the changes in *Mi-2* RNAi transcriptome.
- B Genome browser tracks indicating RNA-seq read coverage at the *Mi-2* locus. *Mi-2* reads are clearly depleted in *Mi-2 RNAi* compared with *elav-GAL4 × mCherry RNAi* controls (adjusted  $P$  value  $< 2.2 \times 10^{-227}$ ).
- C Heatmap showing relative changes in normalised gene expression for the thirty most significantly upregulated genes.
- D Heatmap showing relative changes in normalised gene expression for the 30 most significantly down-regulated genes.
- E, F Read coverage for (E) *gammaTub37C* and (F) *Rp55b* loci, which are non-CNS genes ectopically expressed in *Mi-2* knockdown.

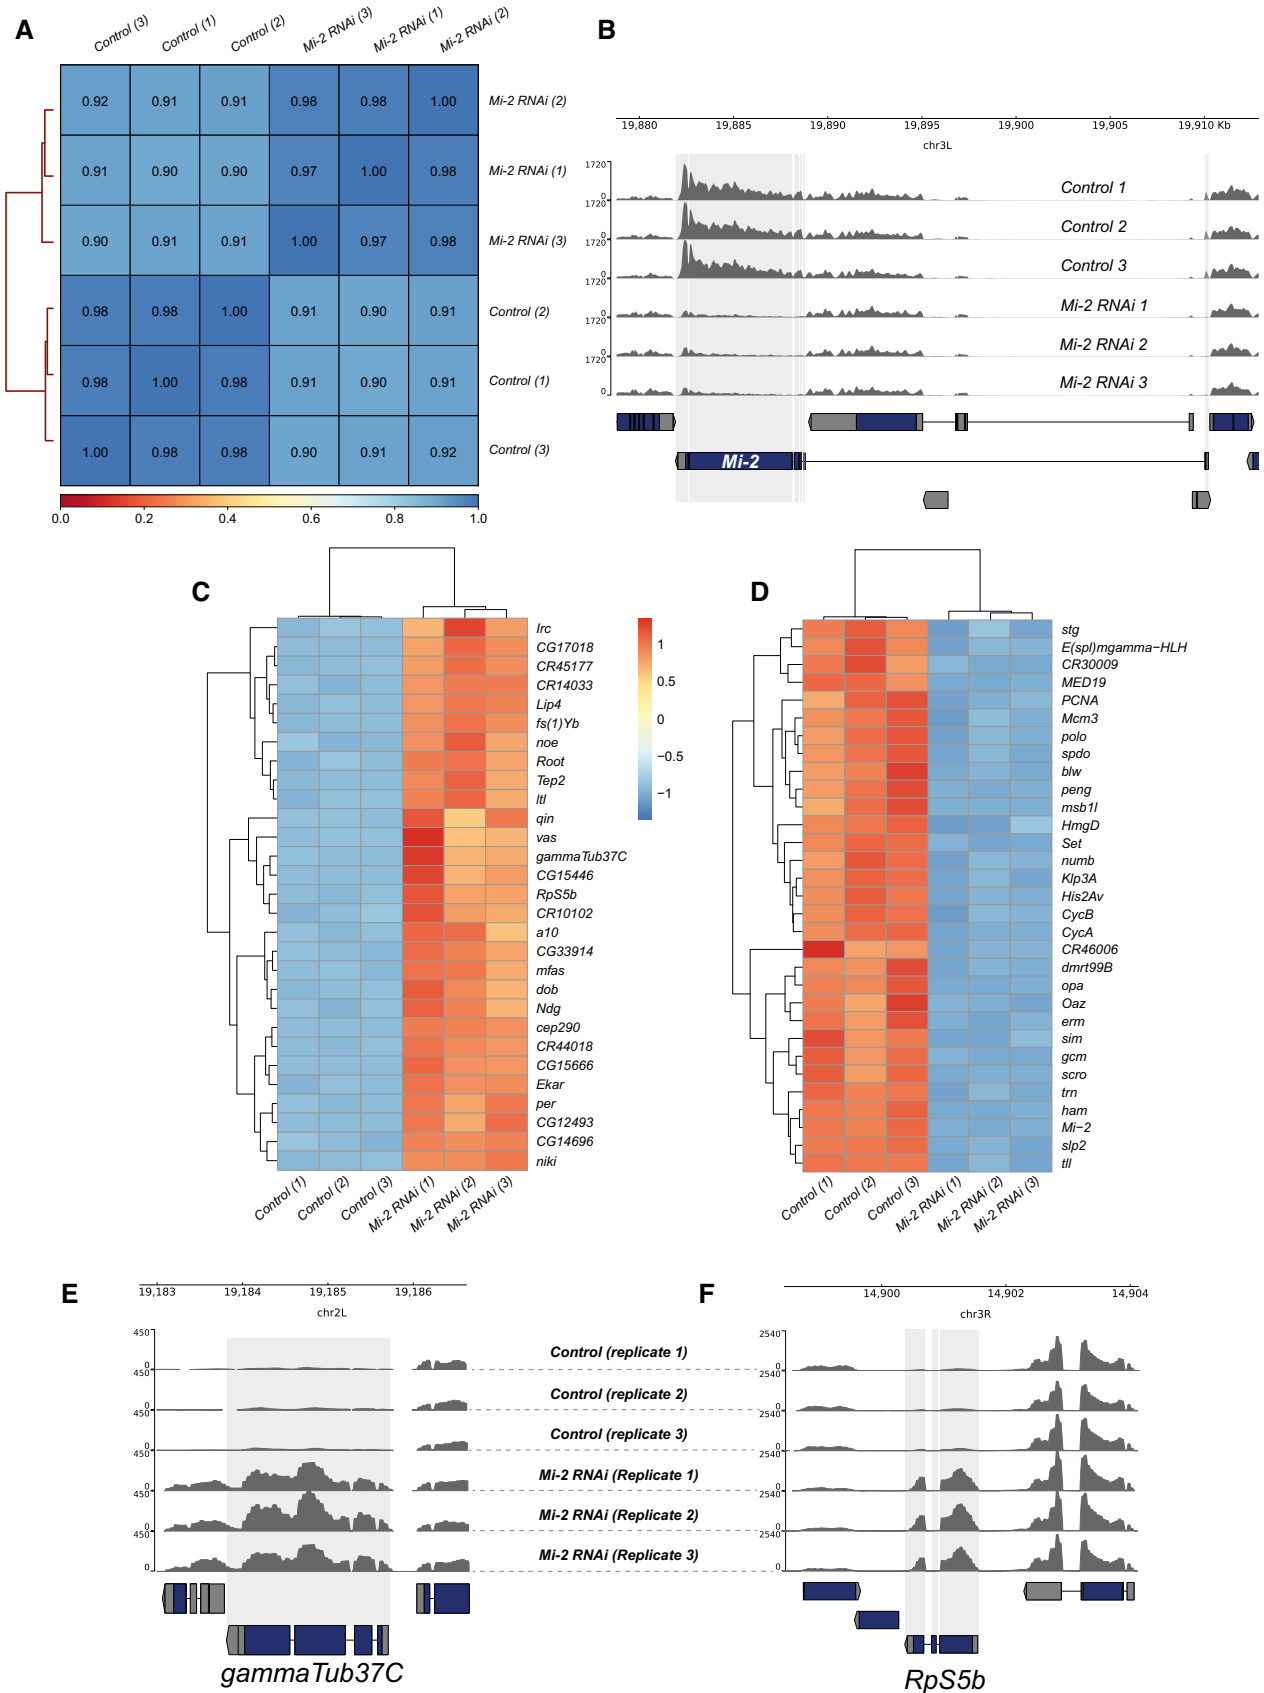

Figure EV2.

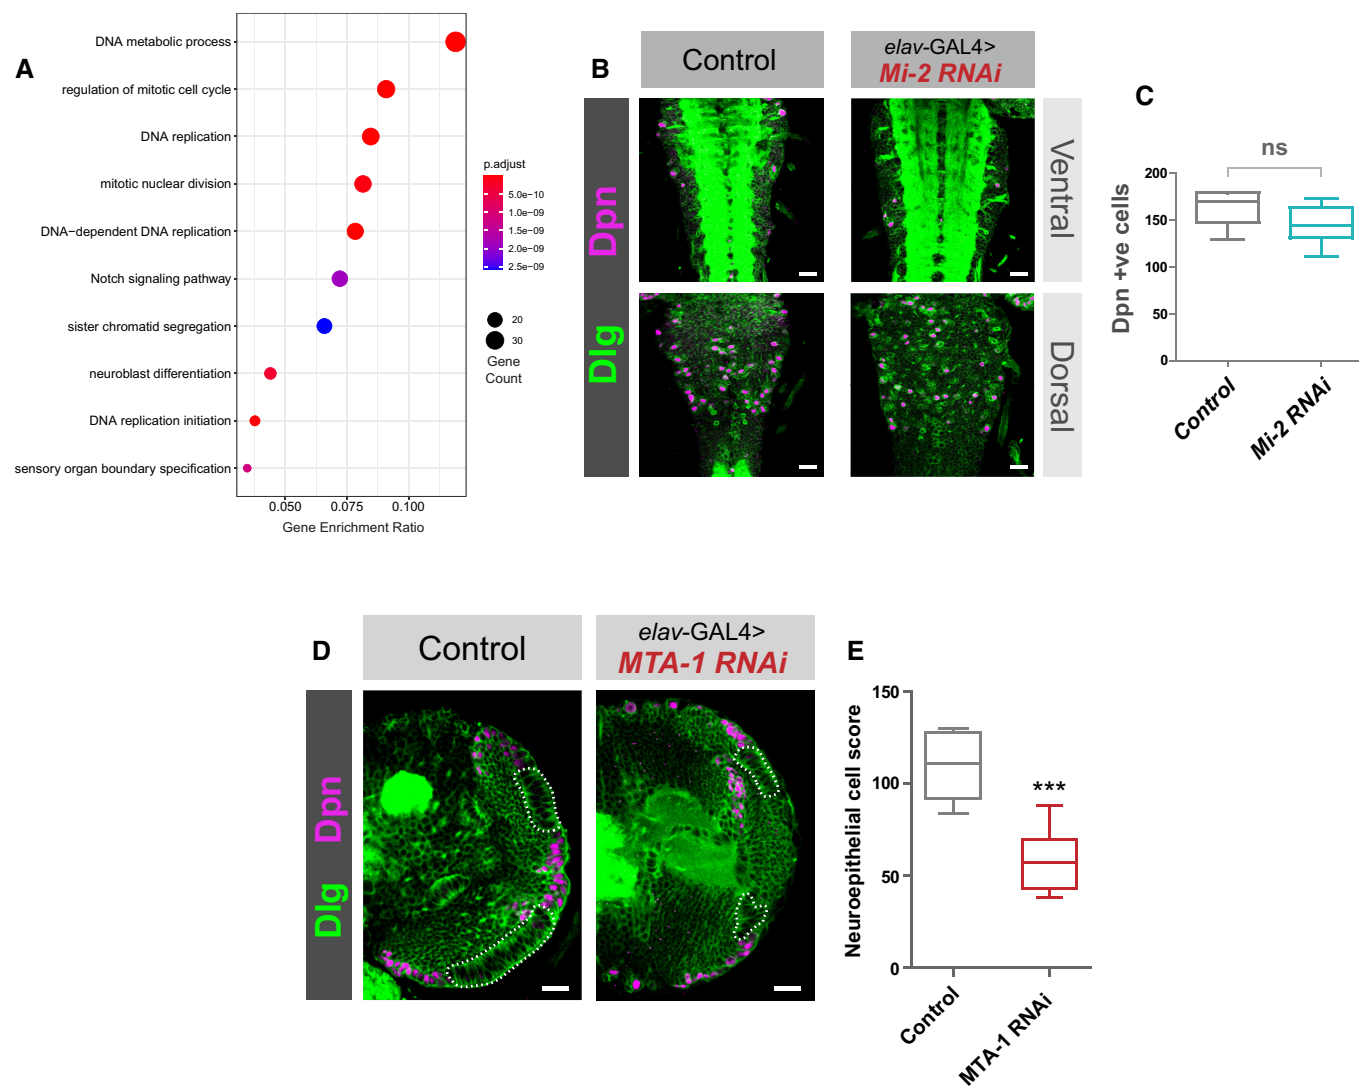

**Figure EV3. *NuRD* knockdown larval brain phenotypes.**

A GO analysis of downregulated genes.

B *Mi-2* knockdown does not affect NSC numbers in the VNC. (B) Example images from ventral and dorsal sections of the VNC. Scale bars = 20  $\mu$ m.

C Quantification of Dpn-positive cells (no significant difference). Six VNCs measured for each genotype. No significant difference (two-tailed student's *t*-test). Represented as a box plot.

D *MTA1-like* knockdown causes an optic lobe phenotype. (D) Representative images of control (*elav-GAL4>; mCherry RNAi*), and *MTA1-like* knockdown in the third instar larval CNS (all scale bars = 20  $\mu$ m). Discs large (Dlg) = green, Deadpan (Dpn) = magenta. Neuroepithelial cells are highlighted by dashed lines.

E Quantification of optic lobe neuroepithelial cells of genotypes shown in panel A. At least eight brains measured for each genotype. \*\*\* $P < 0.001$  (one-tailed student's *t*-test). Represented as a box plot.

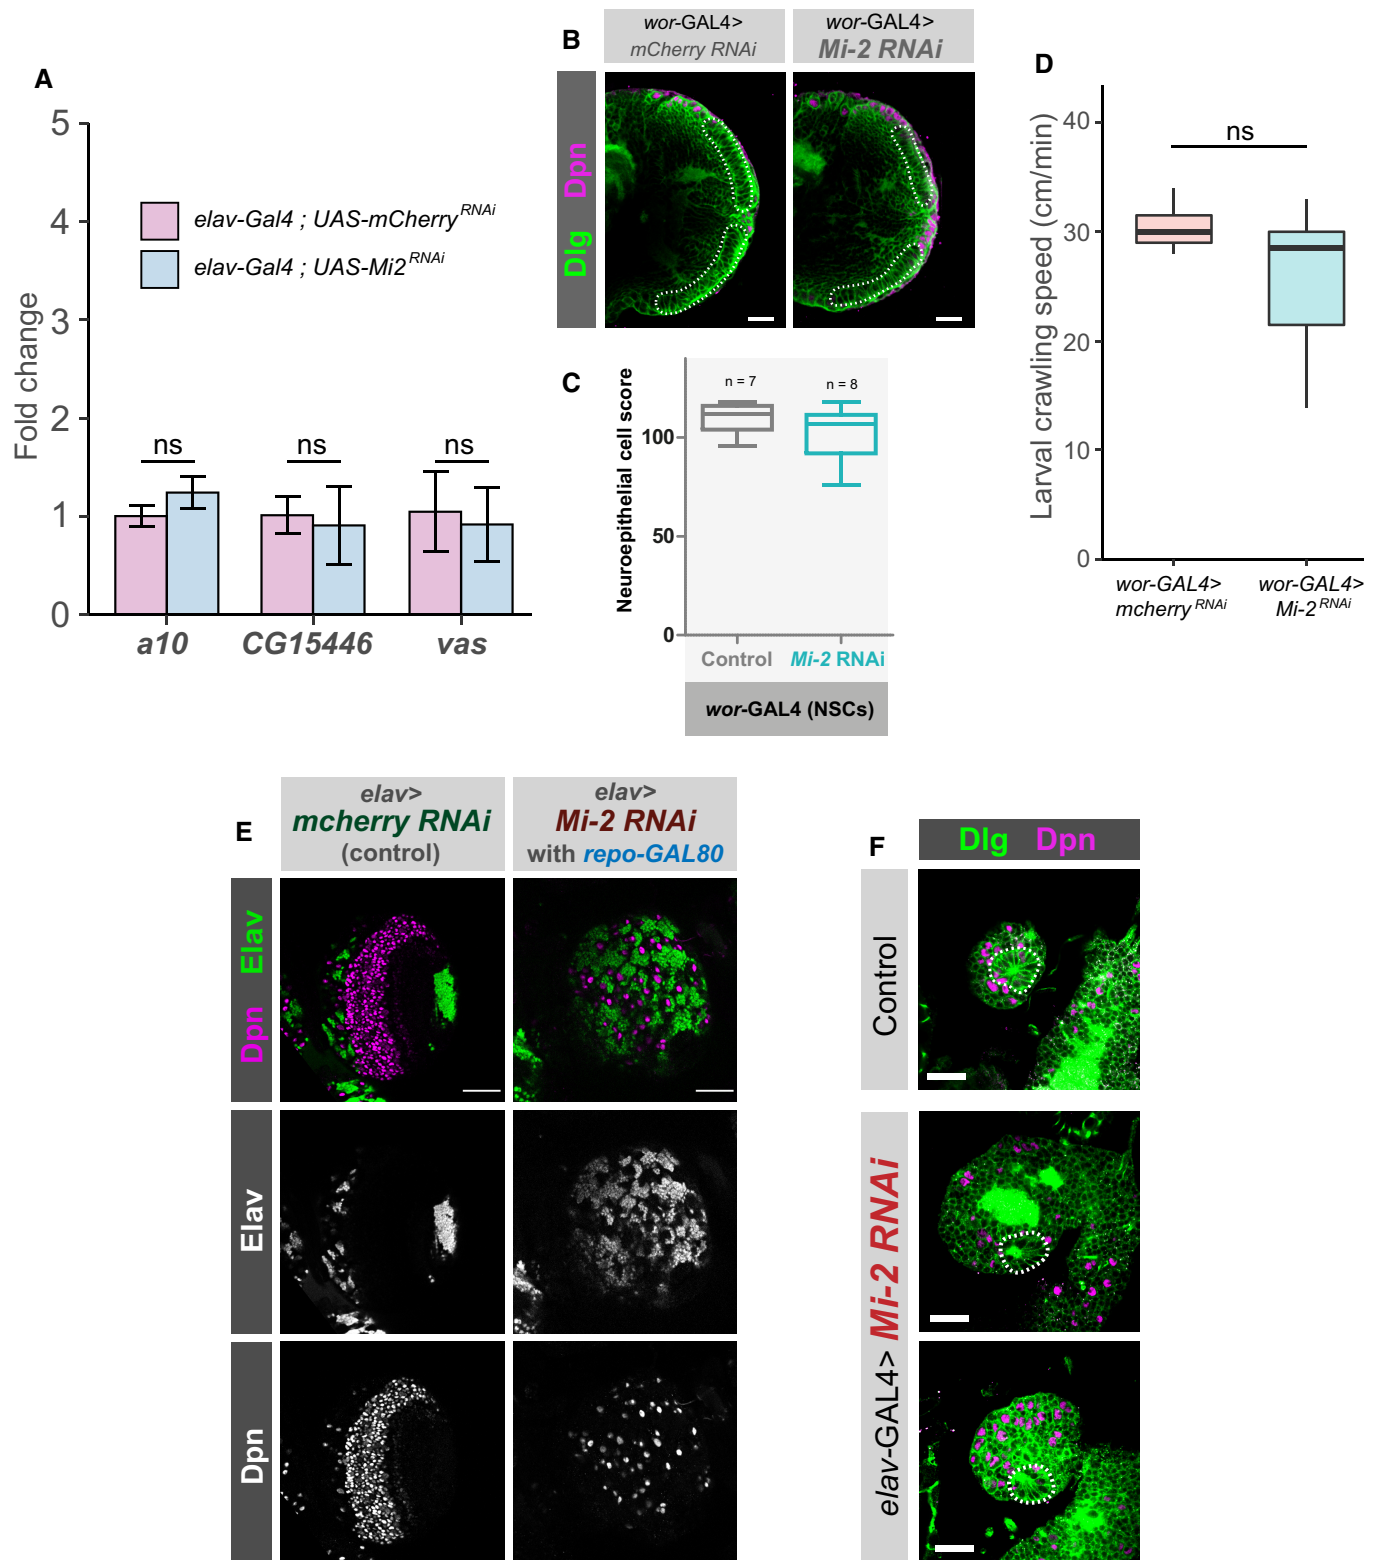

Figure EV4.

**Figure EV4. Differential requirements of Mi-2 during neuronal differentiation.**

- A Knockdown of *Mi-2* in adult brain neurons does not cause ectopic expression of genes. qPCR measurement of gene expression in adult heads. *Mi-2<sup>RNAi</sup>* is induced for 24 h using GAL80<sup>ts</sup>. No significant changes in expression of either *uas*, *a10* or *CG15446* were observed (one-tailed student's *t*-test, represented as mean  $\pm$  SEM). Three biological replicates per genotype.
- B Representative images of optic lobes for control and *Mi-2* knockdown in NSCs.
- C Quantification of optic lobe neuroepithelial cells of genotypes shown in panel B ( $n \geq 7$  for each group). Represented as a box plot. No significant difference found (one-tailed student's *t*-test).
- D Larval crawl speed (cm/min) in *wor-GAL4*  $\times$  *Mi-2* RNAi and *wor-GAL4*  $\times$  *mCherry* RNAi controls. No significant changes in crawl speed were observed (two-tailed student's *t*-test,  $n = 10$  animals per genotype). Represented as a box plot.
- E Optic lobe phenotype is not due to *Mi-2* knockdown in glial cells. Optic lobe of third instar larvae in which *repo-GAL80* represses glial GAL4 expression. Loss of neuroepithelial cells is still observed as in *elav-GAL4; Mi-2 RNAi* brains. Scale bar = 50  $\mu$ m.
- F Characteristic rosette structure of the neuroepithelial cells is present in the control first instar optic lobe and in *elav-GAL4; Mi-2 RNAi* 1<sup>st</sup> instar optic lobes. Scale bar = 20  $\mu$ m.

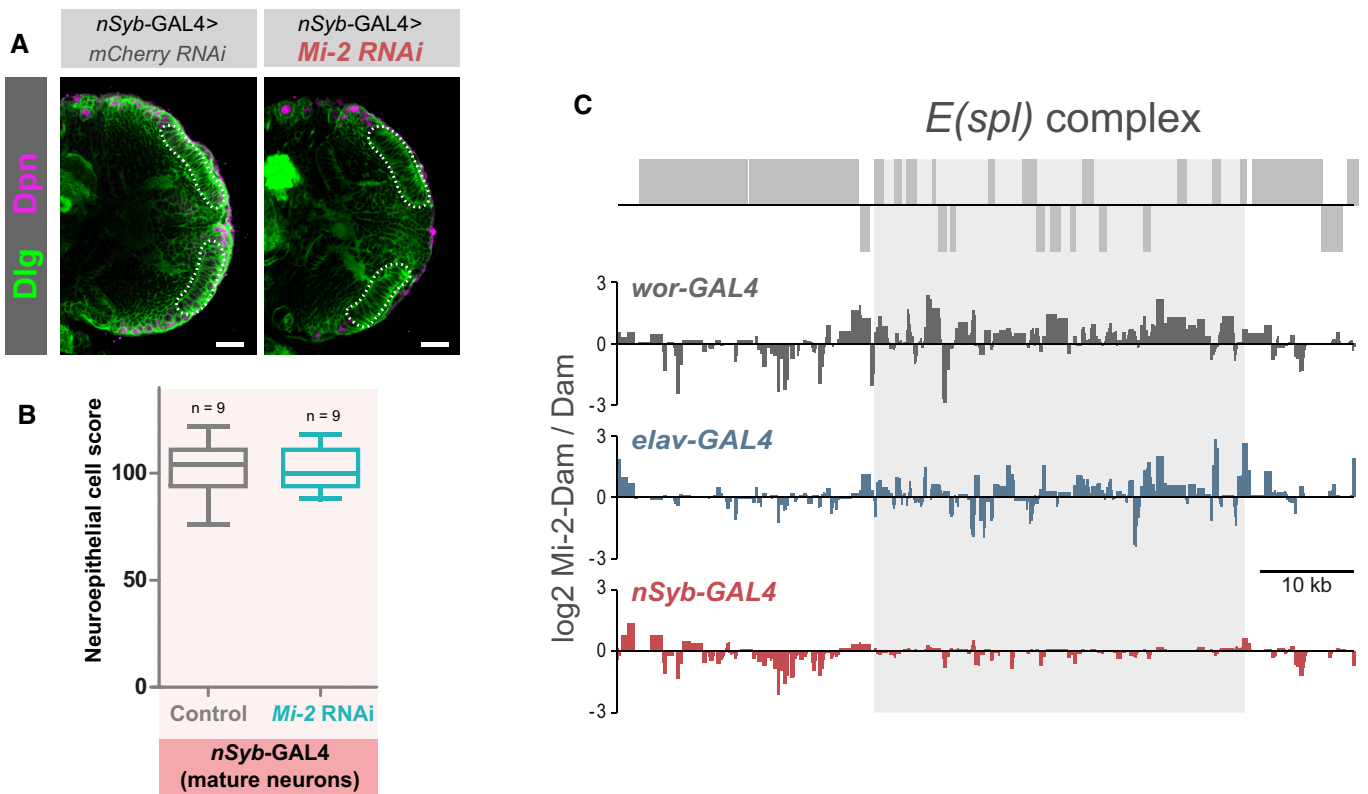**Figure EV5. Differential requirements and binding of Mi-2 during neuronal differentiation.**

- A Representative images of optic lobes for control and *Mi-2* knockdown in mature neurons.
- B Quantification of optic lobe neuroepithelial cells of genotypes shown in panel B ( $n \geq 7$  for each group). Represented as a box plot. No significant difference found (one-tailed student's *t*-test).
- C *Mi-2* binding at the *E(spl)* complex is lost in mature neurons. Grey boxes represent genes.
